# Supplementary material for: Caveolin-1 gene therapy inhibits inflammasome activation to protect from bleomycin-induced pulmonary fibrosis
Source: PubMed Central journal article supplement (PMC6928213; doi:10.1038/s41598-019-55819-y), 2019-12-23
Supplement: 41598_2019_55819_MOESM1_ESM.pdf [file 41598_2019_55819_MOESM1_ESM.pdf]

Caveolin-1 gene therapy inhibits inflammasome activation to protect from bleomycin-induced pulmonary fibrosis

Xin Lin<sup>1</sup>, Michael Barravecchia<sup>1</sup>, R. Matthew Kottmann<sup>2</sup>, Patricia Sime<sup>2</sup> & David A Dean<sup>1\*</sup>

<sup>1</sup>Department of Pediatrics, School of Medicine and Dentistry, University of Rochester, Rochester, New York 14642, USA. <sup>2</sup>Department of Medicine, School of Medicine and Dentistry, University of Rochester, Rochester, New York 14642, USA

\*Correspondence and request for reprint should be addressed to D.D. (email: [david\\_dean@urmc.rochester.edu](mailto:david_dean@urmc.rochester.edu)). Department of Pediatrics, University of Rochester, 601 Elmwood Avenue BOX 850, Rochester, NY 14642, USA

**Supplementary Table S1.** Primers used for RT-PCR

| Name               | Sense                          | Antisense                              |
|--------------------|--------------------------------|----------------------------------------|
| Mouse Cav-1        | 5'-CATCTCTACACTGTTCCCATCC-3'   | 5'-<br>TGTGCGCGTCATACACT<br>T-3'       |
| Mouse GAPDH        | 5'-TGTGATGGGTGTGAACCACGAGAA-3' | 5'-<br>GAGCCCTTCCACAATGC<br>CAAAGTT-3' |
| Human Collagen I   | 5'- CCCTAACCAAGGATGCACTATG-3'  | 5'-<br>CAGTTCTTGGCTGGGAT<br>GTT-3'     |
| Human Caspase-1    | 5'- GGATAAGACCCGAGCTTTGATT-3'  | 5'-<br>CTGCCAGGTA ACTGTCT<br>TCTTC-3'  |
| Human IL-1 $\beta$ | 5'-GGATAAGACCCGAGCTTTGATT-3'   | 5'-<br>CTGCCAGGTA ACTGTCT<br>TCTTC-3'  |
| Human Cav-1        | 5'-CTTCGCCATTCTCTCTTCCT-3'     | 5'-<br>GGTGTGGACGTAGATG<br>GAATAG-3'   |
| Human GAPDH        | 5'-GGTGTGAACCATGAGAAGTATGA-3'  | 5'-<br>GAGTCCTTCCACGATAC<br>CAAAG -3'  |

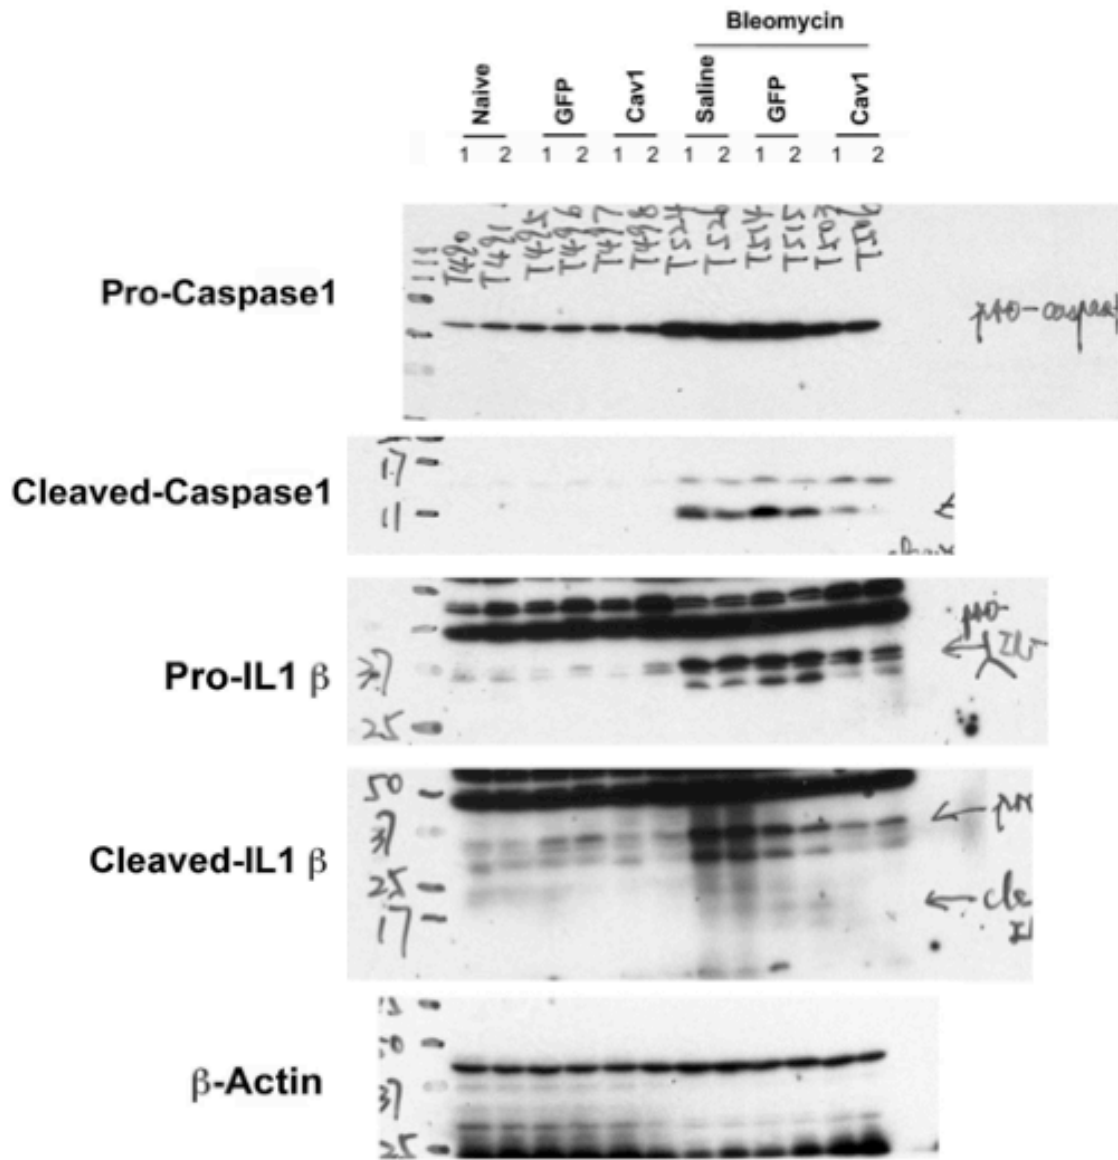

Supplementary Figure S1. Original full-length blots used in Figure 5 are shown.

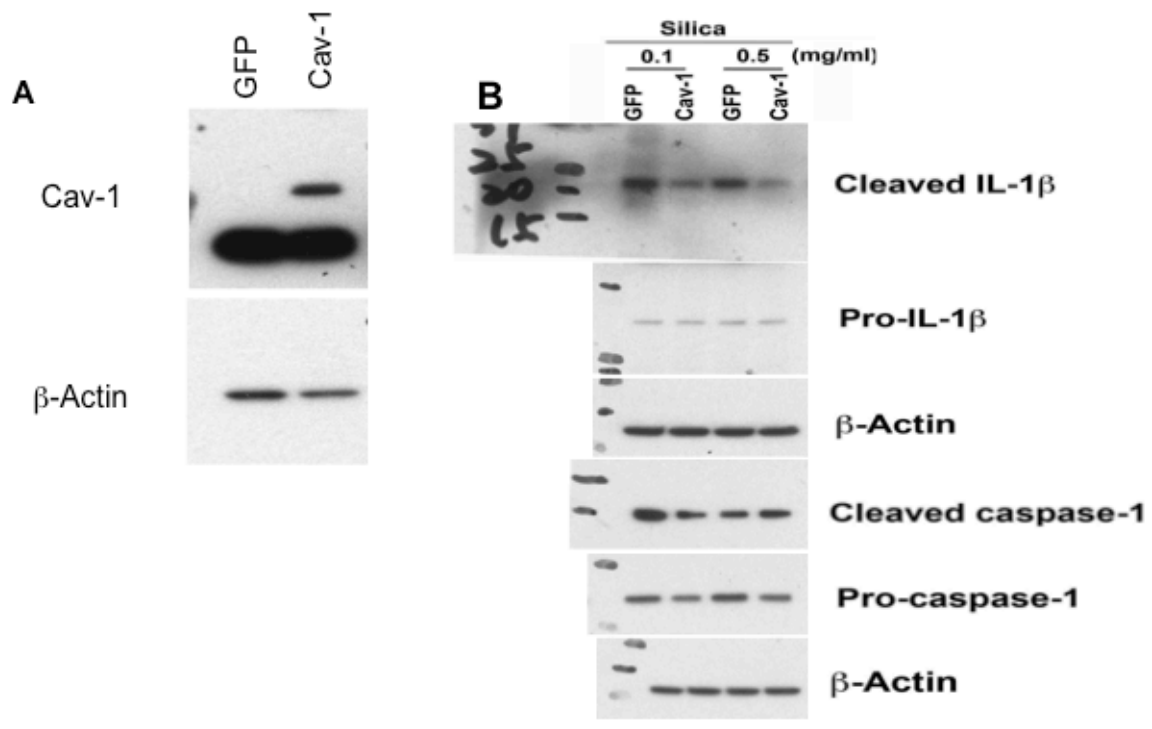

Supplementary Figure S2. Original full-length blots used in Figure 7 are shown.
